# Supplementary material for: Freestanding graphene nanosheets and large-area/patterned graphene nanofilms from indium-catalyzed graphite
Source: Royal Society of Chemistry journal article supplement (doi:10.1039/c6ra08526a), 2016-01-01
Supplement: c6ra08526a1.pdf [file c6ra08526a1.pdf]

## Supporting Information

### Freestanding Graphene Nanosheets and Large-area/patterned Graphene Nanofilms from Indium-catalyzed Graphite

Jun Mok Ha, Hyung San Lim, Ji Won Park, Hyun Jin Kim, and Sung Oh Cho\*

Department of Nuclear and Quantum Engineering, Korea Advanced Institute of Science and Technology (KAIST), 373-1 Guseong, Yuseong, Daejeon 305-701, Republic of Korea

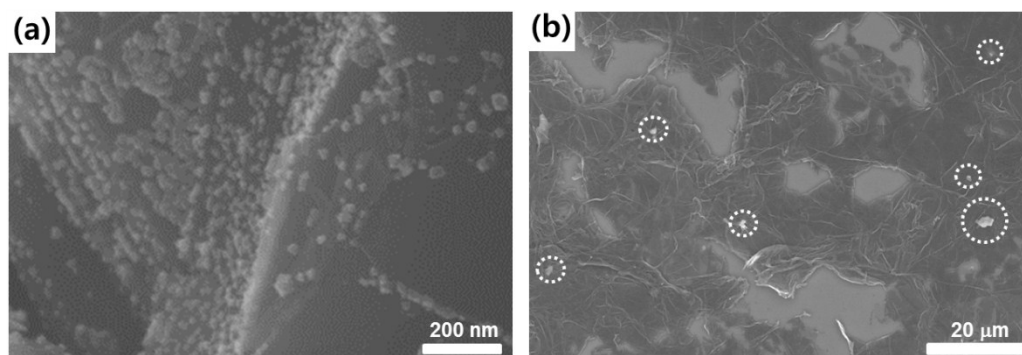

**Fig. S1** (a) FESEM image of graphite powders annealed with In microparticles at 500 °C for 90 min. Nanometer-sized In particles are deposited on the surface graphite powder. (b) FESEM image of the graphite powder annealed with In particles at 800 °C for 90 min. The size of the graphite powders was decreased (circles in (b)) and carbon films were formed over the melted In layers.

---

\* Corresponding Author. Tel/Fax: +82 42 350 3823/+82 42 350 3810. E-mail address: [socho@kaist.ac.kr](mailto:socho@kaist.ac.kr) (S. O. Cho)

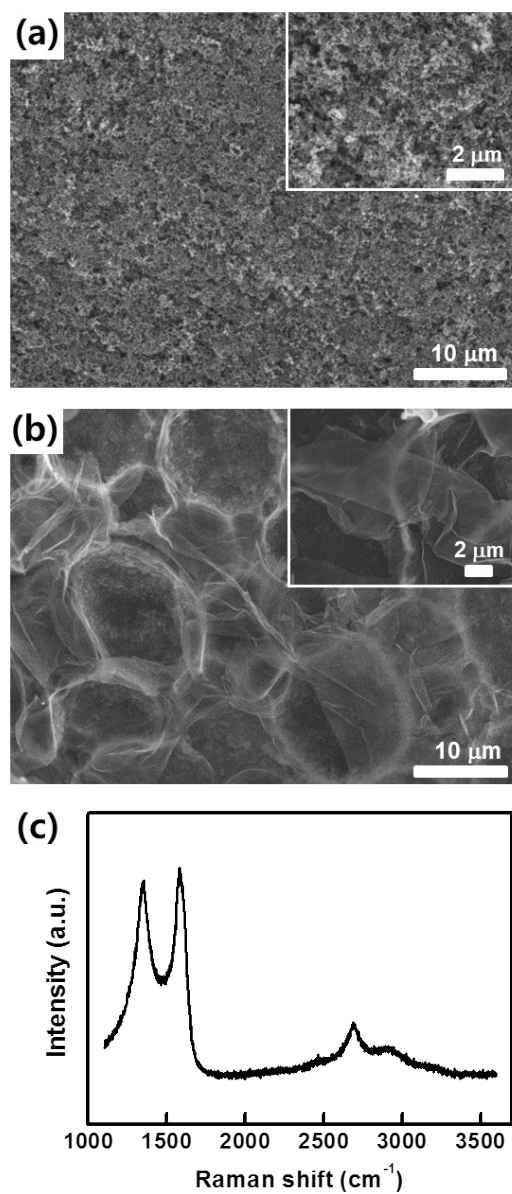

**Fig. S2** (a) FESEM image of pristine amorphous carbon. Inset in (a): The pristine amorphous carbon is mainly composed of amorphous black carbon nanoparticles. (b) FESEM image of spherical-shaped graphene nanosheets synthesized at 900 °C for 90 min. Diameters of the holes range from 1 to 30 μm, which are well corresponding with the sizes of the In particles. Inset in (b): Magnified FESEM image of the spherical-shaped graphene nanosheet. (c) Raman spectrum of the nanosheets.

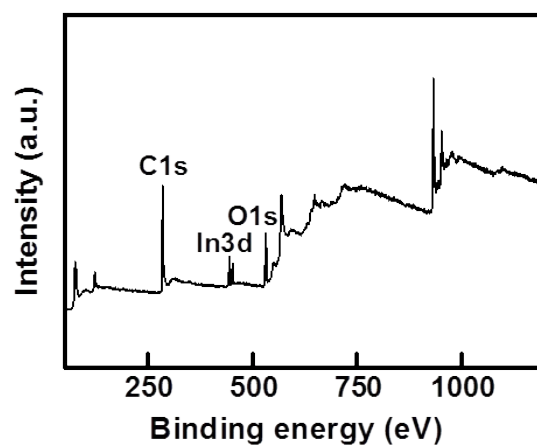

**Fig. S3** XPS spectrum of graphene nanosheets synthesized on a Cu substrate after annealing processes at 900 °C for 90 min. A small amount of In was left on a Cu substrate. Except for C1s, O1s, and In3d peaks, other peaks in the XPS spectra are originated from the Cu substrate.

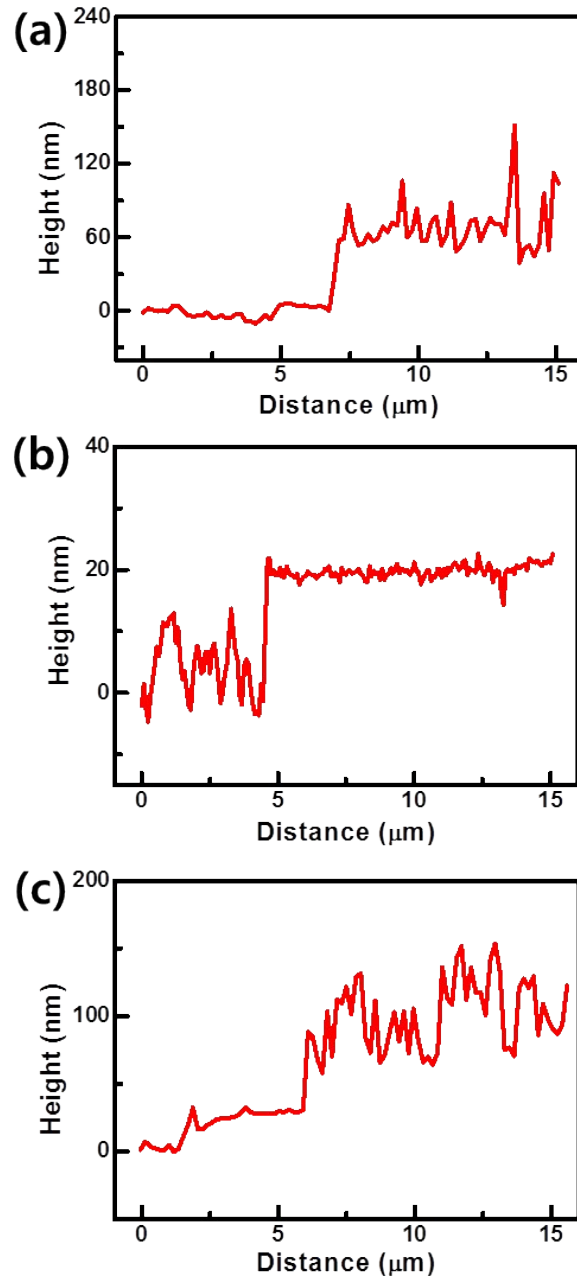

**Fig. S4** Thicknesses of graphene nanofilms grown on  $\text{SiO}_2/\text{Si}$  substrates using In layers of (a)  $\sim 150$ , (b)  $\sim 70$ , and (c)  $\sim 250$  nm thicknesses, respectively.

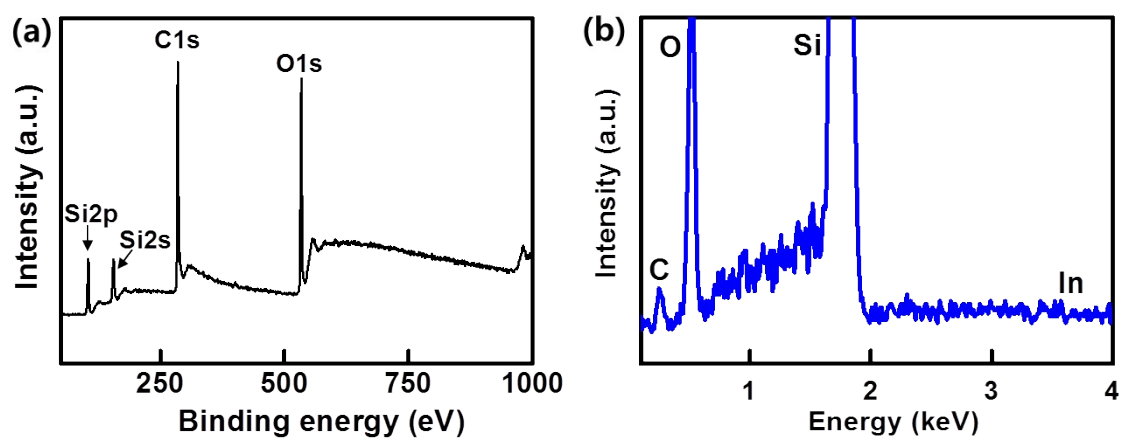

**Fig. S5** (a) XPS spectrum of graphene nanofilms grown on a SiO<sub>2</sub>/Si substrate. (b) Measured EDX spectrum of graphene nanofilms grown on a SiO<sub>2</sub>/Si substrate.
